# Supplementary material for: A very low lasing threshold of DABNA derivatives with DFB structures
Source: Royal Society of Chemistry journal article supplement (doi:10.1039/d2qm01040b), 2022-11-24
Supplement: d2qm01040b1.pdf [file d2qm01040b1.pdf]

## Supporting Information

# Very low lasing threshold of DABNA derivatives with DFB structures

Masashi Mamada,<sup>\*ab</sup> Satoshi Maedera,<sup>a</sup> Susumu Oda,<sup>c</sup> Thanh Ba Nguyen,<sup>a</sup> Hajime Nakanotani,<sup>ab</sup> Takuji Hatakeyama,<sup>d</sup> and Chihaya Adachi<sup>\*ab</sup>

<sup>a</sup>Center for Organic Photonics and Electronics Research (OPERA), Kyushu University, Fukuoka 819-0395, Japan

<sup>b</sup>International Institute for Carbon Neutral Energy Research (WPI-I2CNER), Kyushu University, Nishi, Fukuoka 819-0395, Japan

<sup>c</sup>Department of Chemistry, Graduate School of Science and Technology, Kwasei Gakuin University, 2-1 Gakuen, Sanda, Hyogo 669-1337, Japan

<sup>d</sup>Department of Chemistry, Graduate School of Science, Kyoto University, Sakyo-ku, Kyoto 606-8502, Japan

[mamada@opera.kyushu-u.ac.jp](mailto:mamada@opera.kyushu-u.ac.jp)

[adachi@cstf.kyushu-u.ac.jp](mailto:adachi@cstf.kyushu-u.ac.jp)

## Contents:

|                                                                                                                                           |   |
|-------------------------------------------------------------------------------------------------------------------------------------------|---|
| <b>Table S1.</b> Instruments .....                                                                                                        | 3 |
| <b>Methods S1.</b> Synthesis .....                                                                                                        | 3 |
| <b>Fig. S1.</b> ASE characteristics of the doped films. ....                                                                              | 4 |
| <b>Table S2.</b> ASE thresholds of DABNA-1 and DABNA-2 doped in mCBP .....                                                                | 4 |
| <b>Methods S2.</b> Stimulated emission cross-section ( $\sigma_{em}$ ) .....                                                              | 5 |
| <b>Fig. S2.</b> Normalized UV-Vis absorption (dashed lines) and PL spectra (solid lines) .....                                            | 5 |
| <b>Fig. S3.</b> ASE characteristics of DABNA-NP. ....                                                                                     | 6 |
| <b>Fig. S4.</b> PL transient decay spectra for the blend films. The delayed fluorescence lifetimes ( $\tau$ ) were 77, 85, and 34.7 ..... | 7 |
| <b>Fig. S5.</b> PL stability.....                                                                                                         | 7 |
| <b>Supplementary References</b> .....                                                                                                     | 8 |

**Table S1.** Instruments

| Instruments                               | Brands and Types                                           | Conditions                                                                                                            |
|-------------------------------------------|------------------------------------------------------------|-----------------------------------------------------------------------------------------------------------------------|
| UV-Vis                                    | Perkin-Elmer Lambda 950-PKA<br>UV-vis spectrophotometer    | The light source consisted of Deuterium (D2) and Tungsten Iodide (50W) lamps for the ultraviolet and visible regions. |
| PL                                        | Horiba Jobin-Yvon FluoroMax-4<br>JASCO FP-8600 fluorometer | the excitation wavelength was set to the absorption maximum                                                           |
| PL quantum Yield                          | Hamamatsu Photonics<br>Quantaaurus-QY C11347-01            | Absolute PL quantum yield. The measurement error for the obtained values on this instrument is $\pm 3\%$ .            |
| Transient photoluminescence decay         | Hamamatsu Photonics<br>Quantaaurus-Tau C11367-03           |                                                                                                                       |
| UV/ozone                                  | Nippon Laser & Electronics Lab.<br>NL-UV253                | 15 min                                                                                                                |
| Laser scanning microscope                 | Olympus LEXT                                               |                                                                                                                       |
| Surface profiler                          | Bruker Dektak XT                                           | A tip radius of 12.5 $\mu\text{m}$ and a scan resolution of 0.168 $\mu\text{m}/\text{point}$                          |
| Variable angle spectroscopic ellipsometry | J.A. Woollam, M-2000U                                      | Different angles from 45°–75° (steps: 5°)<br>An analytical software: J.A. Woollam, WVASE32                            |
| SEM                                       | SU8000, Hitachi                                            |                                                                                                                       |

**Methods S1.** Synthesis

DABNA-NP was prepared by modifying the literature.<sup>[S1]</sup> The characterization data of the material can be found in another paper.<sup>[S2]</sup>

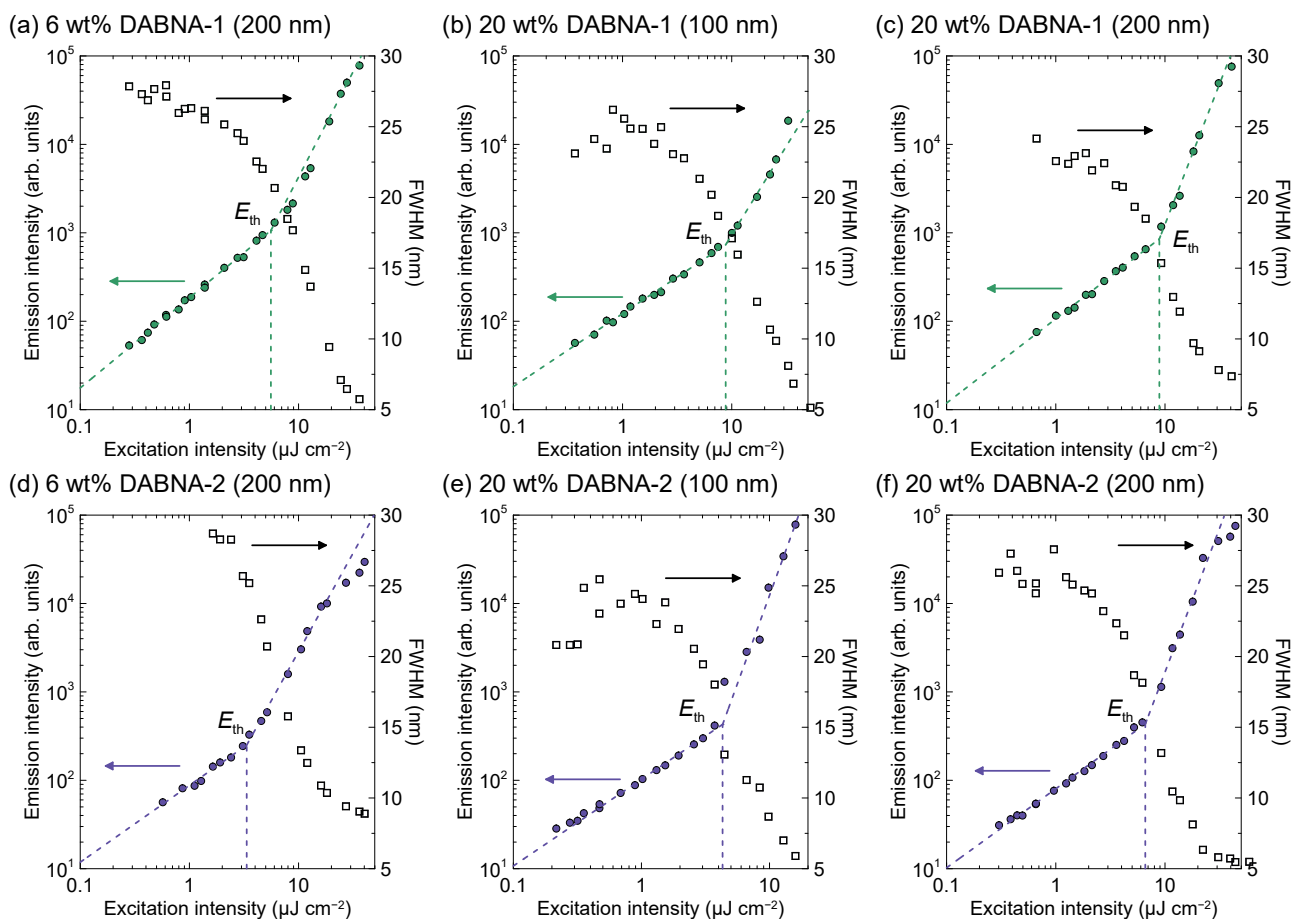

**Fig. S1.** ASE characteristics of the doped films. Output PL intensity and FWHM values as a function of the excitation energy for (a) 6 wt% DABNA-1 doped film with thickness of 200 nm, (b) 20 wt% DABNA-1 doped film with thickness of 100 nm, (c) 20 wt% DABNA-1 doped film with thickness of 200 nm, (d) 6 wt% DABNA-2 doped film with thickness of 200 nm, (e) 20 wt% DABNA-2 doped film with thickness of 100 nm, and (f) 20 wt% DABNA-2 doped film with thickness of 200 nm.

**Table S2.** ASE thresholds of DABNA-1 and DABNA-2 doped in mCBP

| Compound       | Concentration in mCBP | Thickness | $E_{th}^{ASE}$<br>[ $\mu\text{J cm}^{-2}$ ] <sup>b</sup> |
|----------------|-----------------------|-----------|----------------------------------------------------------|
| <b>DABNA-1</b> | 6 wt%                 | 100 nm    | 3.3                                                      |
|                | 6 wt%                 | 200 nm    | 5.6                                                      |
|                | 20 wt%                | 100 nm    | 8.8                                                      |
|                | 20 wt%                | 200 nm    | 8.9                                                      |
| <b>DABNA-2</b> | 6 wt%                 | 100 nm    | 2.1                                                      |
|                | 6 wt%                 | 200 nm    | 3.3                                                      |
|                | 20 wt%                | 100 nm    | 4.3                                                      |
|                | 20 wt%                | 200 nm    | 6.6                                                      |

## Methods S2. Stimulated emission cross-section ( $\sigma_{em}$ )

The  $\sigma_{em}$  spectra were obtained from the following equation:<sup>[S3]</sup>

$$\sigma_{em} = \frac{\lambda^4 E_f(\lambda)}{8\pi n^2(\lambda) c \tau}$$

where  $\lambda$  is the wavelength,  $E_f(\lambda)$  is the distribution of fluorescence quantum yield in wavelength,  $n(\lambda)$  is the refractive index of the active gain layer,  $c$  is the speed of light, and  $\tau$  is the fluorescence lifetime.

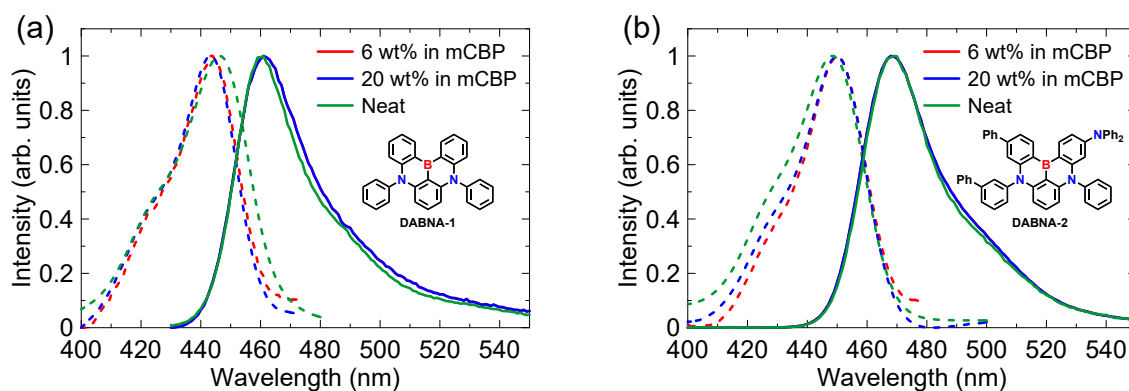

**Fig. S2.** Normalized UV-Vis absorption (dashed lines) and PL spectra (solid lines) for (a) DABNA-1 and (b) DABNA-2.

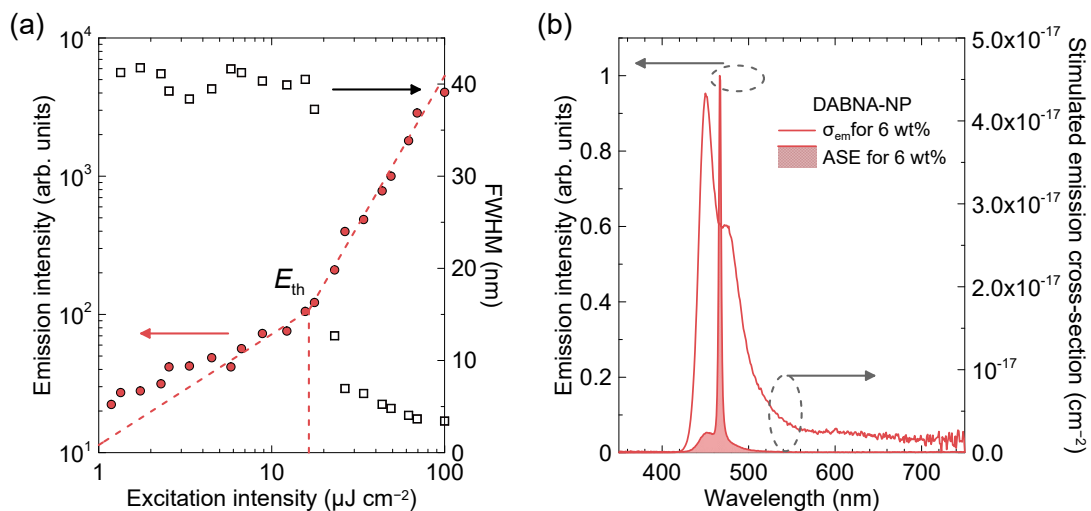

**Fig. S3.** ASE characteristics of DABNA-NP. (a) PL intensity and FWHM values from edge of the 100-nm-thick films of 6 wt%-DABNA-NP doped mCBP. (b) The stimulated cross-section spectra and PL spectra above the amplified spontaneous emission (ASE) threshold for the films of DABNA-NP.

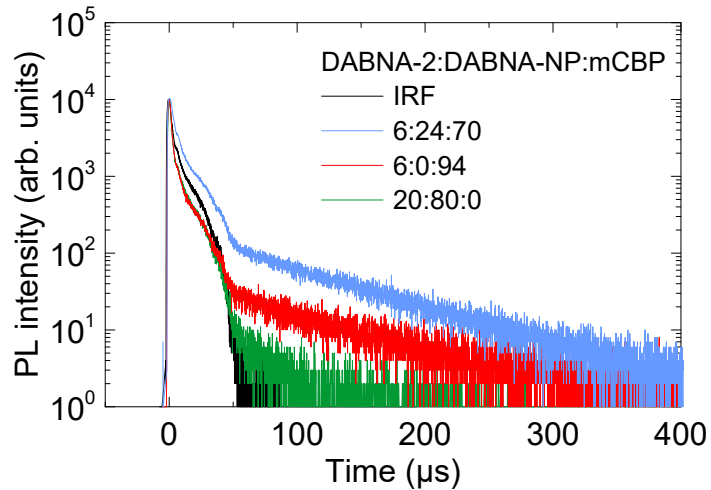

**Fig. S4.** PL transient decay spectra for the blend films. The delayed fluorescence lifetimes ( $\tau$ ) were 77, 85, and 34  $\mu$ s for 6:24:70 wt%, 6:0:94 wt%, and 20:80:0 wt% of DABNA-2:DABNA-NP:mCBP, respectively.

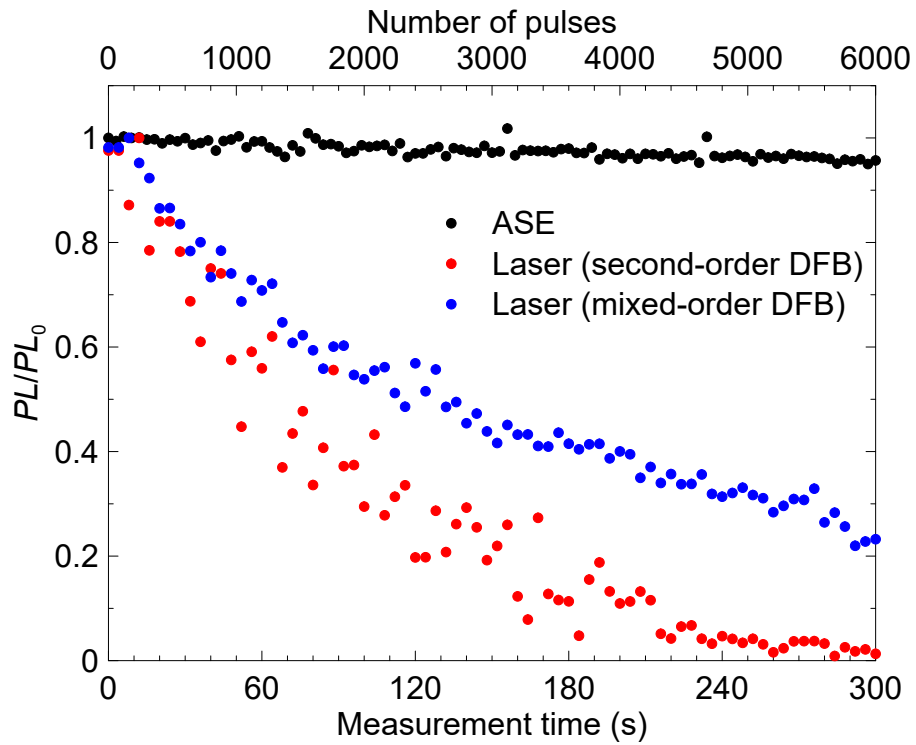

**Fig. S5.** PL stability. PL intensity normalized to the initial PL intensity for 6 wt% DABNA2 doped mCBP films as a function of operating time. The nitrogen gas laser (337 nm, 0.8 ns pulse, and 20 Hz) was used for the excitation source. The excitation intensity was  $1.0 \mu\text{J cm}^{-2}$  for lasing, while  $20 \mu\text{J cm}^{-2}$  for ASE.

### Supplementary References

[S1] S. Oda, W. Kumano, T. Hama, R. Kawasumi, K. Yoshiura and T. Hatakeyama, Carbazole-based DABNA analogues as highly efficient thermally activated delayed fluorescence materials for narrowband organic light-emitting diodes, *Angew. Chem. Int. Ed.* 2021, **60**, 2882–2886.

[S2] Y. Wang, Y. Duan, R. Guo, S. Ye, K. Di, W. Zhang, S. Zhuang and L. Wang, A periphery cladding strategy to improve the performance of narrowband emitters, achieving deep-blue OLEDs with CIEy < 0.08 and external quantum efficiency approaching 20%, *Org. Electron.*, 2021, **97**, 106275.

[S3] H. Nakanotani, T. Furukawa, T. Hosokai, T. Hatakeyama and C. Adachi, Light amplification in molecules exhibiting thermally activated delayed fluorescence, *Adv. Opt. Mater.* 2017, **5**, 1700051.
